# Supplementary material for: Coordination assembly and host–guest chemistry of a triply interlocked [2]catenane
Source: Royal Society of Chemistry journal article supplement (doi:10.1039/d1qi00174d), 2021-01-01
Supplement: d1qi00174d1.pdf [file d1qi00174d1.pdf]

## Electronic Supplementary Information

for

Coordination assembly and host-guest chemistry of a triply  
interlocked [2]catenane

Weibin Yu,<sup>\*a</sup> Feng-Yi Qiu,<sup>a</sup> Shi-Ting Luo,<sup>a</sup> Hua-Tian Shi,<sup>a</sup> Guozan Yuan,<sup>\*a</sup>, and Xianwen Wei<sup>\*a</sup>

Analysis and Testing Central Facility, School of Chemistry and Chemical Engineering, Anhui  
University of Technology, Maanshan 243002, P. R. China.

E-mail: yuweibin@ahut.edu.cn

### Table of contents

1. NMR spectra of complex 1
2. ESI-TOF-MS spectra of host-guest assemblies
3. Calculated binding constants  $K$  values based on  $^1\text{H}$  NMR titrations
4. IR spectra of complex 1
5. Crystal data of 1

# 1. NMR spectra of complex 1.

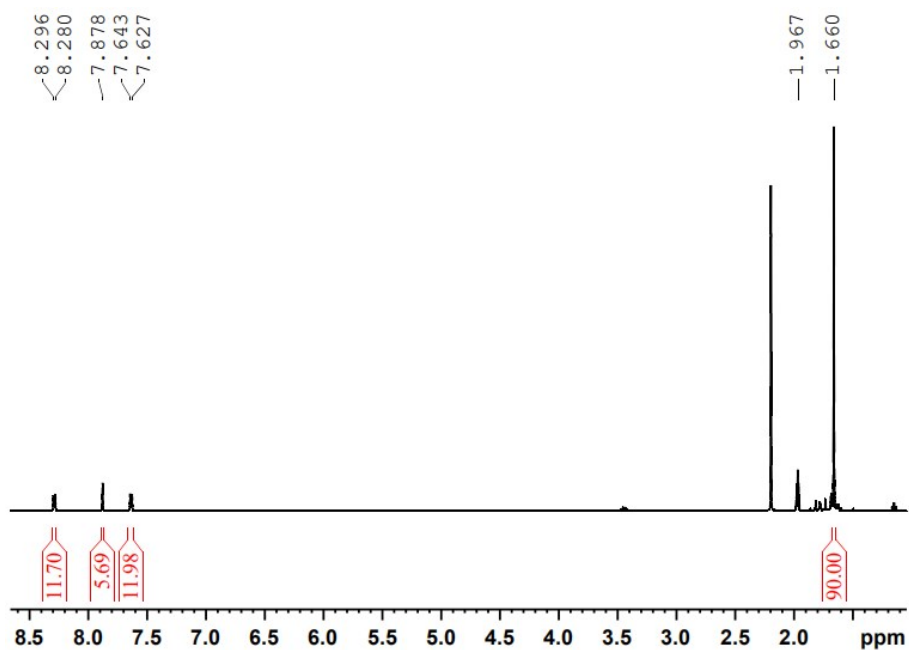

Fig. S1. The  $^1\text{H}$  NMR spectrum of **1-monomer** at low concentration in  $\text{CD}_3\text{CN-}d_3$ .

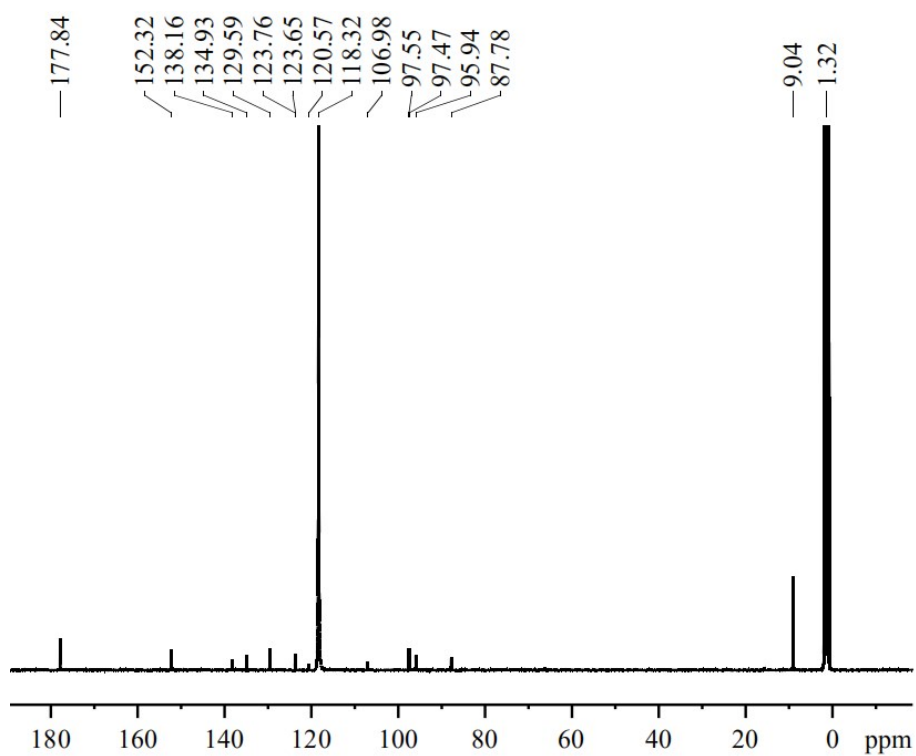

Fig. S2. The  $^{13}\text{C}$  NMR spectrum of **1-monomer** at low concentration in  $\text{CD}_3\text{CN-}d_3$ .

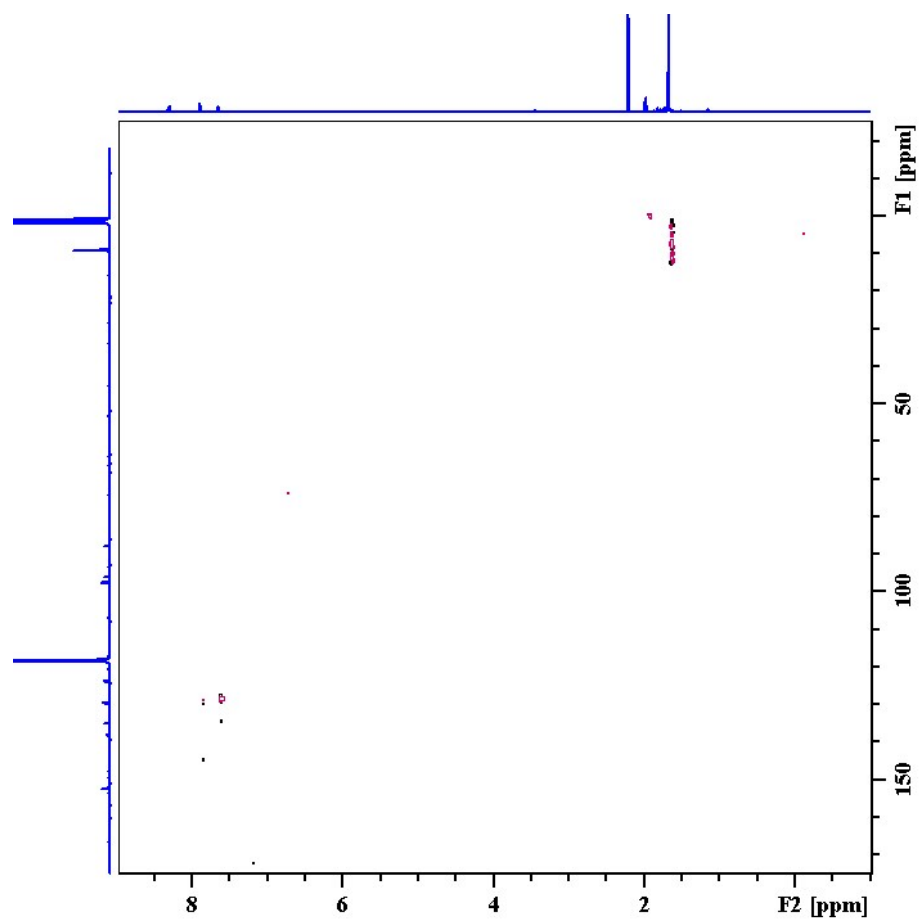

**Fig. S3.** The  $\{^1\text{H}-^{13}\text{C}\}$  (HSQC) NMR spectrum of **1-monomer** at low concentration in  $\text{CD}_3\text{CN}-d_3$ .

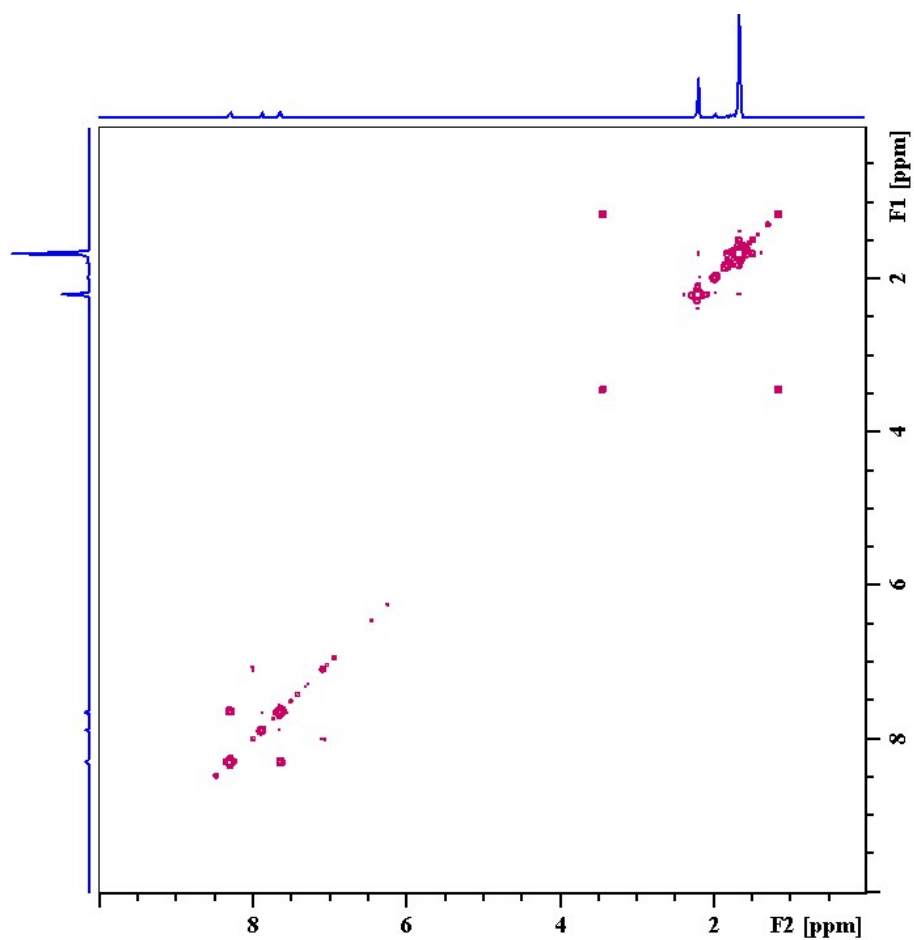

**Fig. S4.** The  $\{^1\text{H}-^1\text{H}\}$ (COSY) NMR spectrum of **1-monomer** at low concentration in  $\text{CD}_3\text{CN}-d_3$ .

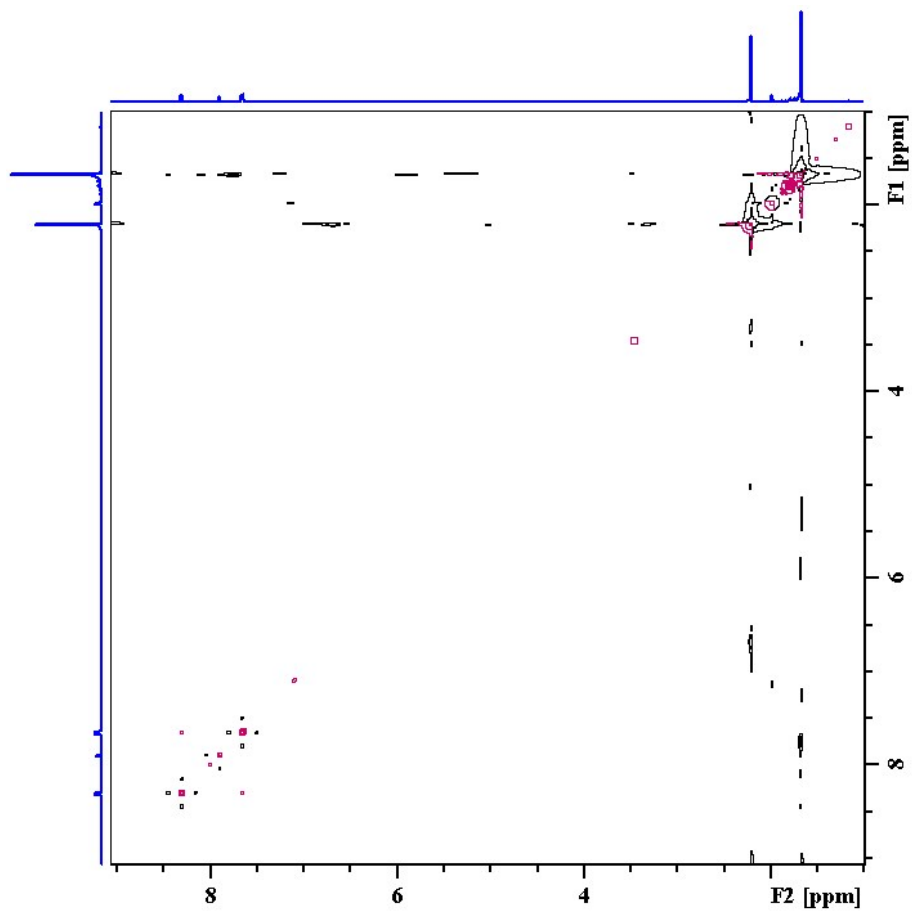

Fig. S5. The  $\{^1\text{H}-^1\text{H}\}$ (NOESY) NMR spectrum of **1-monomer** at low concentration in  $\text{CD}_3\text{CN}-d_3$ .

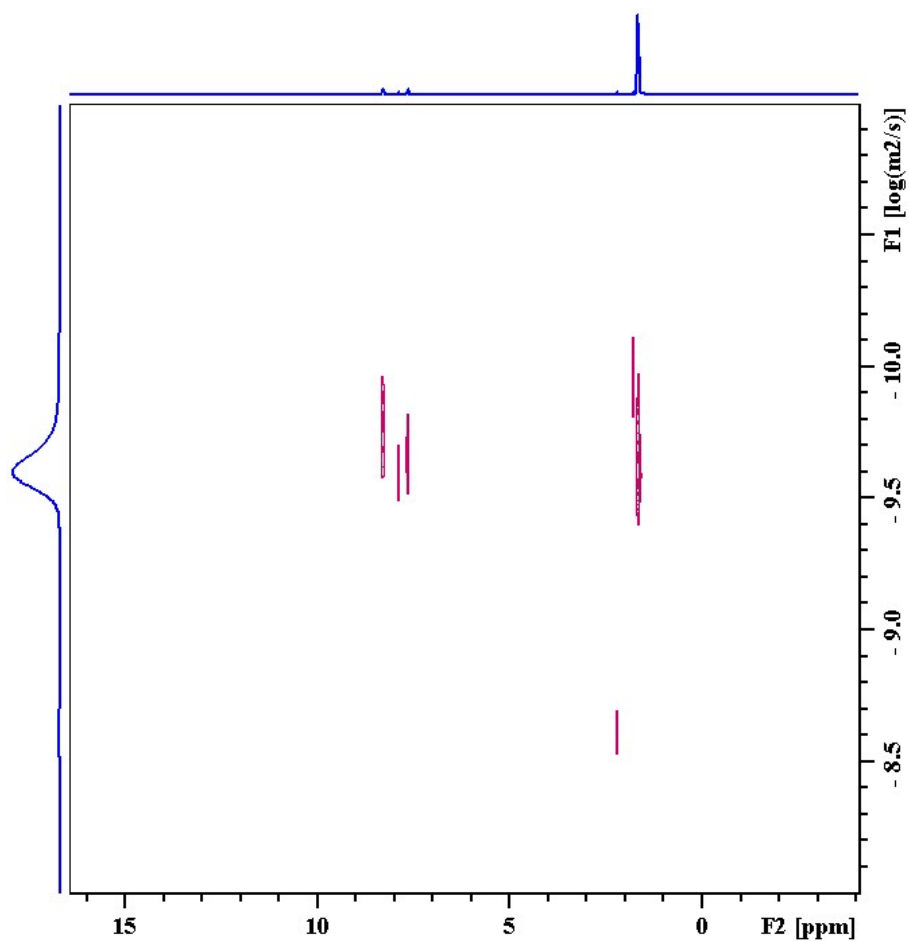

Fig. S6. The  $\{^1\text{H}-^1\text{H}\}$ (DOSY) NMR spectrum of **1-monomer** at low concentration in  $\text{CD}_3\text{CN}-d_3$ .

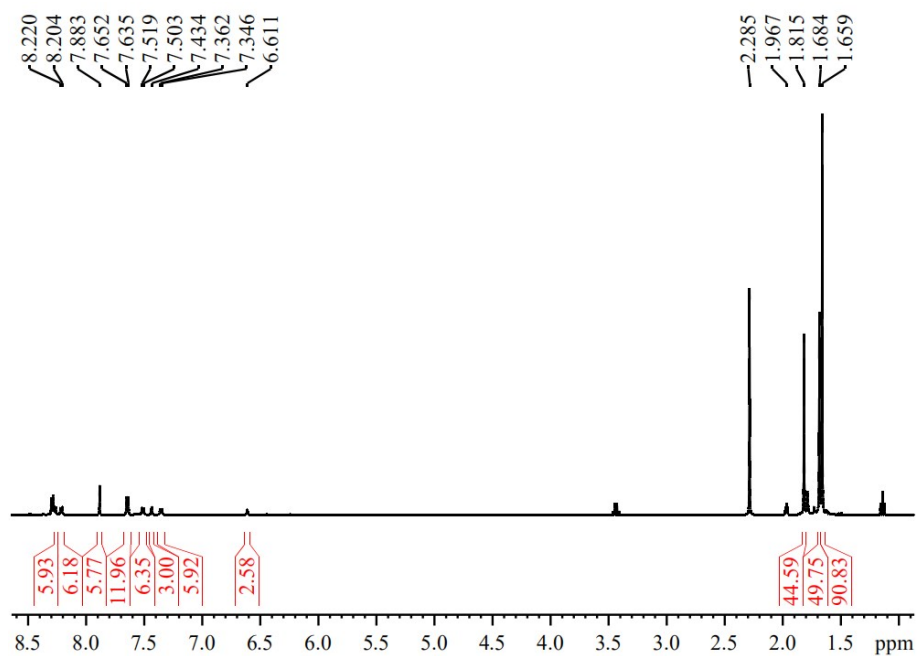

Fig. S7. The  $^1\text{H}$  NMR spectrum of coexistence of **1-monomer** and **1-catenane** at high concentration in  $\text{CD}_3\text{CN}-d_3$ .

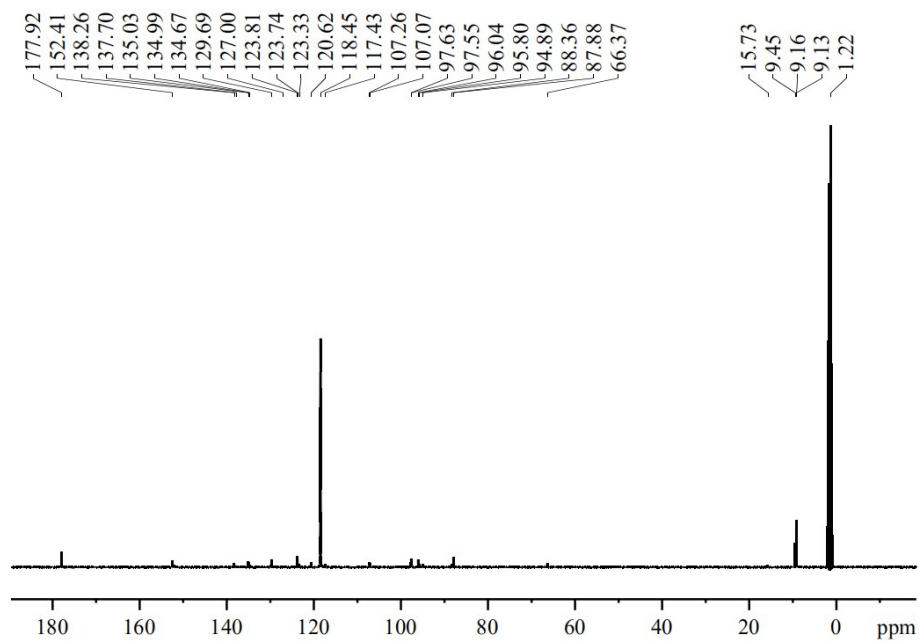

Fig. S8. The  $^{13}\text{C}$  NMR spectrum of coexistence of **1-monomer** and **1-catenane** at high concentration in  $\text{CD}_3\text{CN-}d_3$ .

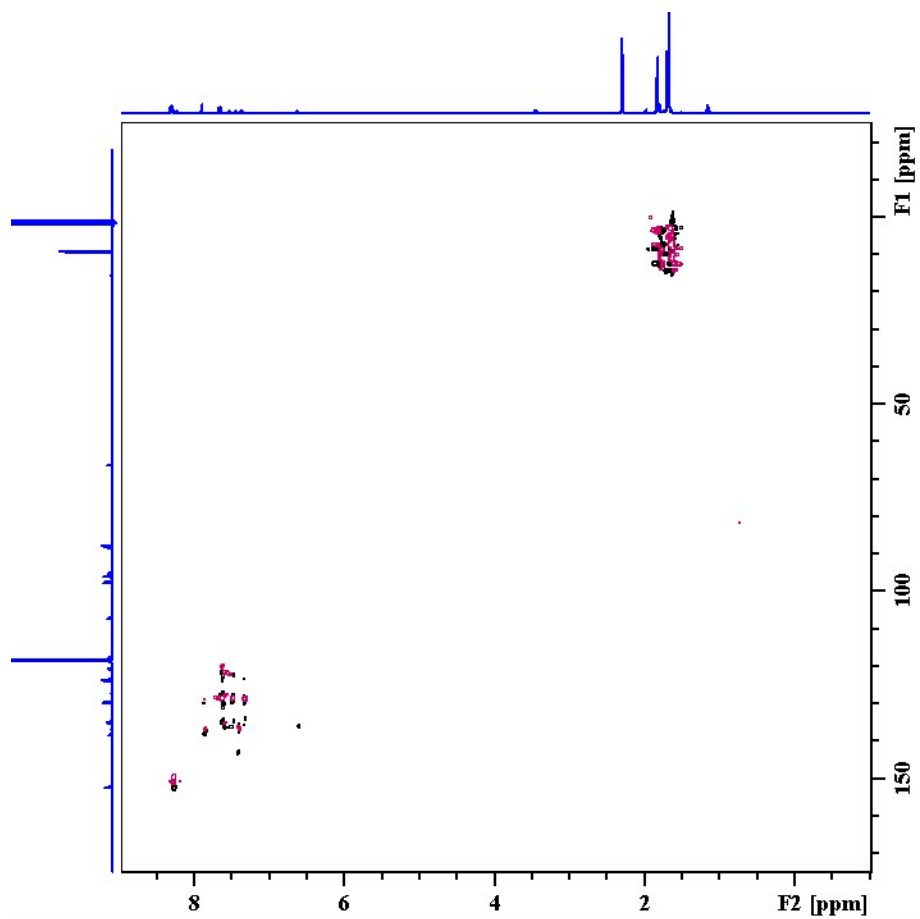

Fig. S9. The  $\{^1\text{H-}^{13}\text{C}\}$  (HSQC) NMR spectrum of coexistence of **1-monomer** and **1-catenane** at high concentration in  $\text{CD}_3\text{CN-}d_3$ .

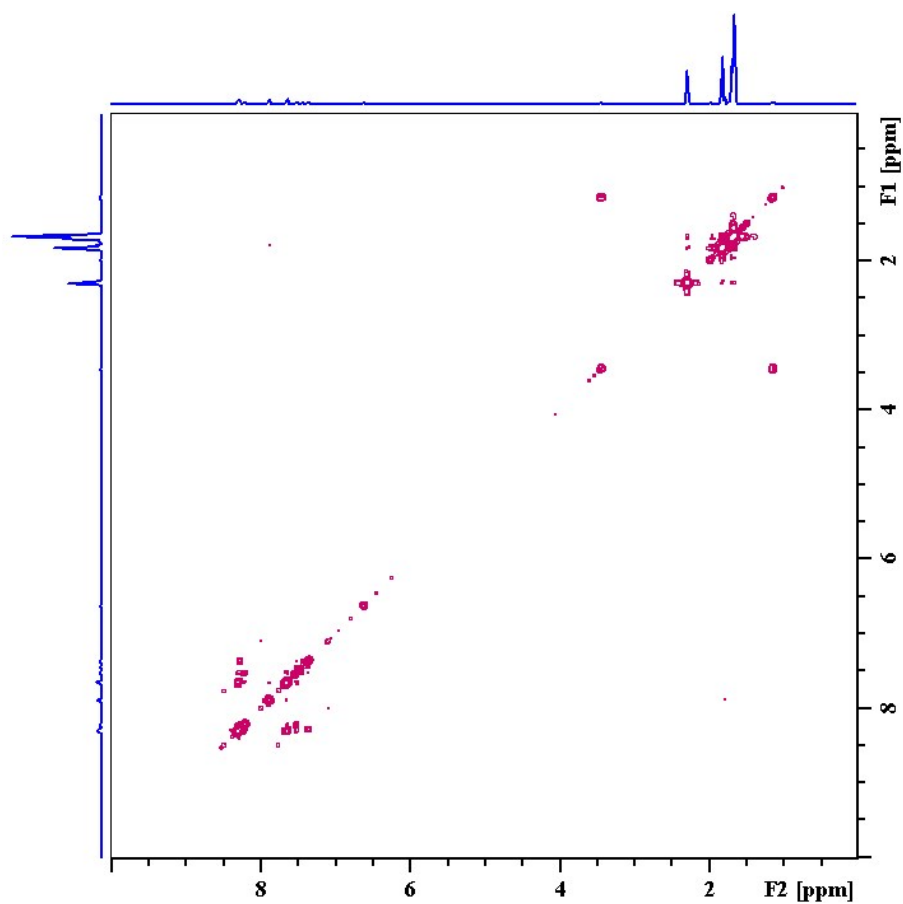

**Fig. S10.** The  $\{^1\text{H}-^1\text{H}\}$ (COSY) NMR spectrum of coexistence of **1-monomer** and **1-catenane** at high concentration in  $\text{CD}_3\text{CN}-d_3$ .



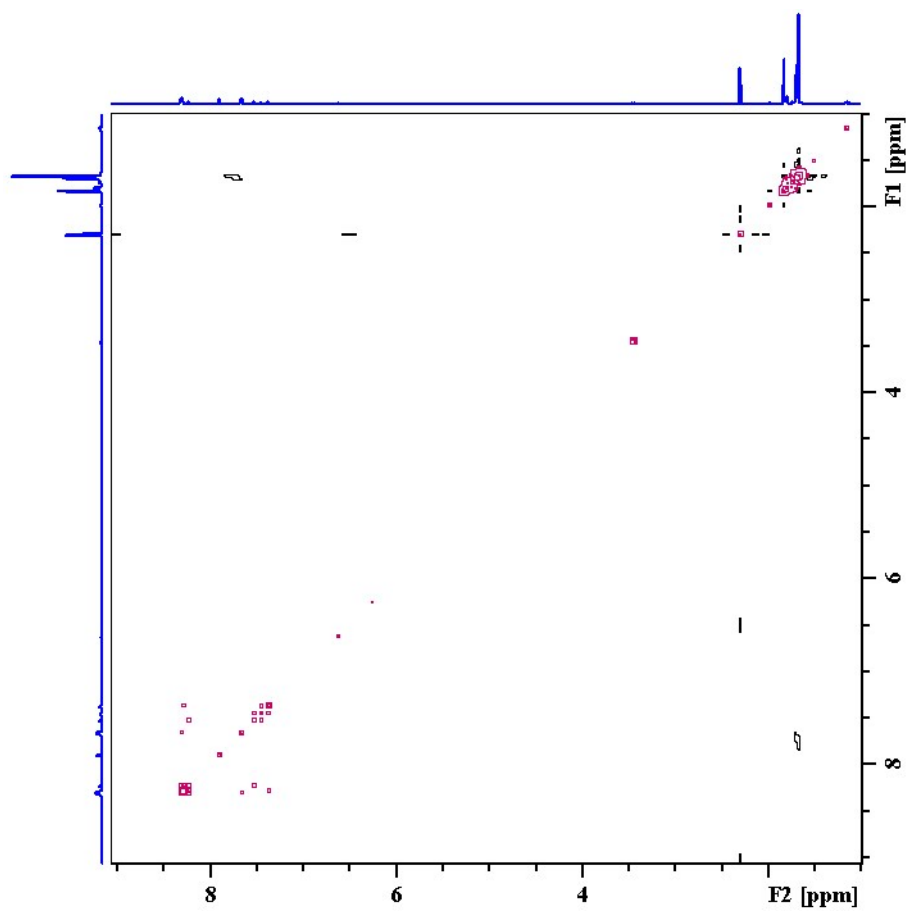

**Fig. S11.** The  $\{^1\text{H}-^1\text{H}\}$ (NOESY) NMR spectrum of coexistence of **1-monomer** and **1-catenane** at high concentration in  $\text{CD}_3\text{CN}-d_3$ .

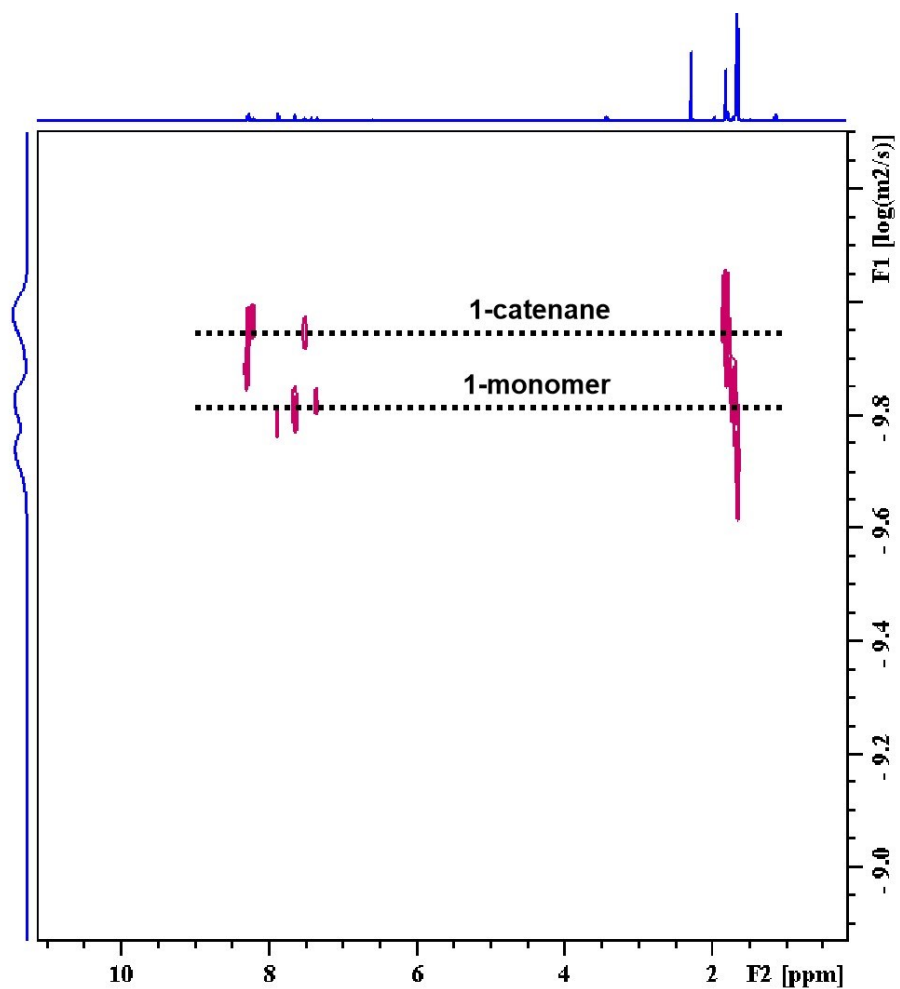

**Fig. S12.** The  $\{^1H-^1H\}$  (DOSY) NMR spectrum of coexistence of **1-monomer** and **1-catenane** at high concentration in  $CD_3CN-d_3$ .

## 2. ESI-TOF-MS spectra of host-guest assemblies.

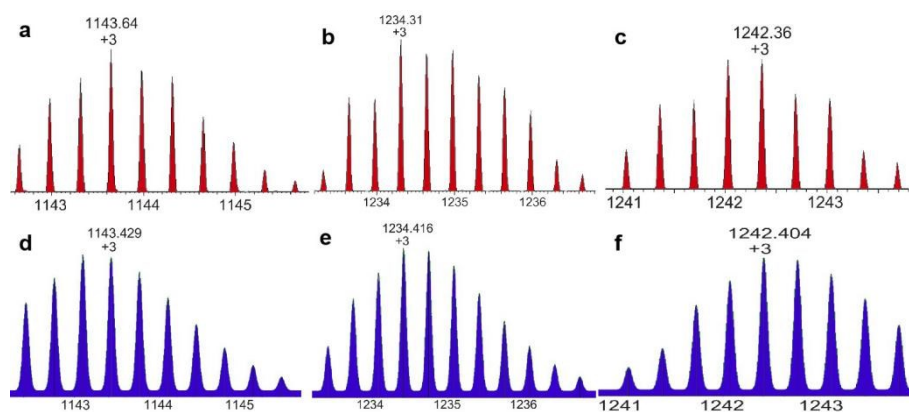

**Fig. S13.** ESI-TOF-MS of guests encapsulated by **1-monomer** in methanol. a) {[triphenylene □**1-monomer**] + 7CH<sub>3</sub>OH+H<sub>2</sub>O-3OTf}<sup>3+</sup>; b) {[perylene □**1-monomer**] + 6CH<sub>3</sub>OH-3OTf}<sup>3+</sup>; c) {[coronene □**1-monomer**] + 3CH<sub>3</sub>OH+4H<sub>2</sub>O-3OTf}<sup>3+</sup>; d), e), and f) are simulated for a), b), and c), respectively.

### 3. NMR spectra of host-guest assemblies.

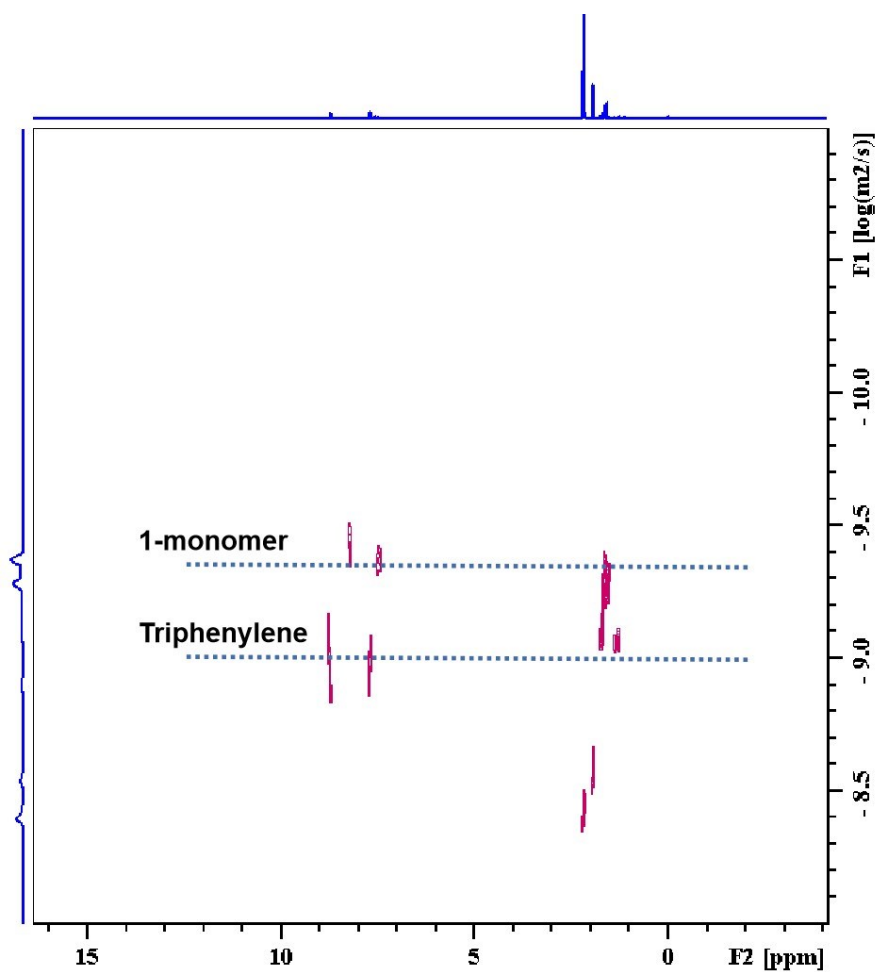

Fig. S14. The  $^1\text{H}$ - $^1\text{H}$  DOSY NMR spectra of triphenylene encapsulated by **1-monomer**.

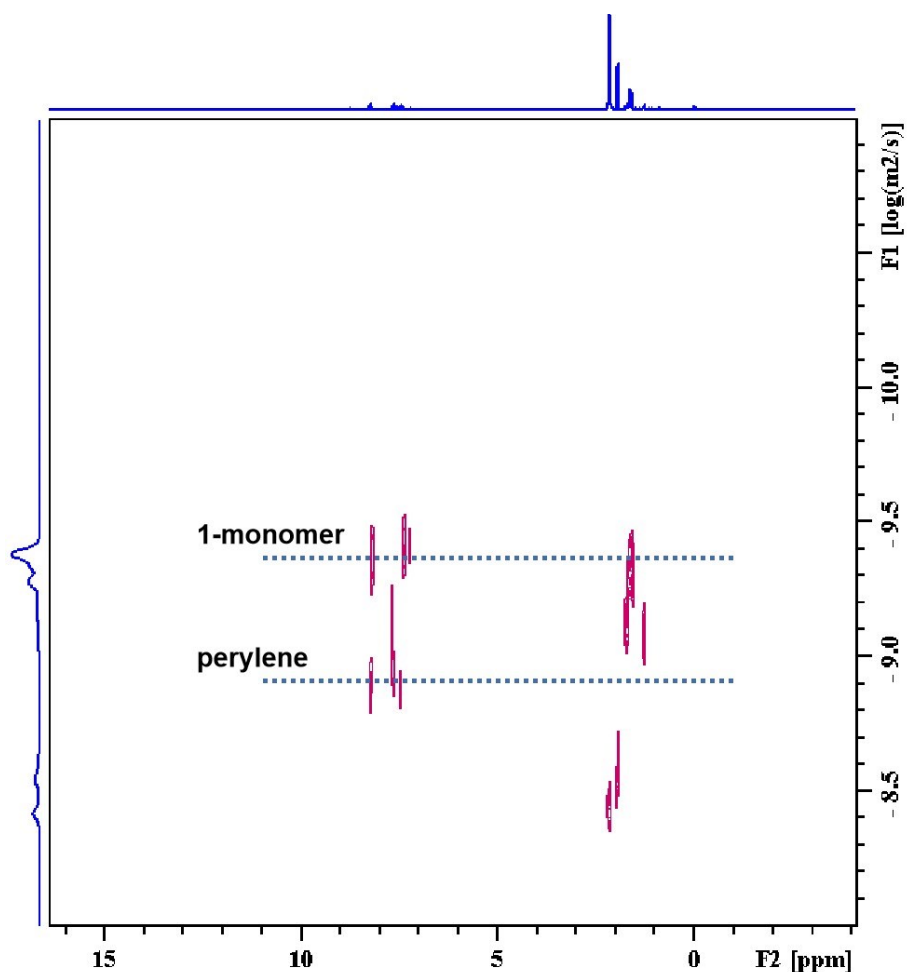

Fig. S15. The  $^1\text{H}$ - $^1\text{H}$  DOSY NMR spectra of perylene encapsulated by 1-monomer.

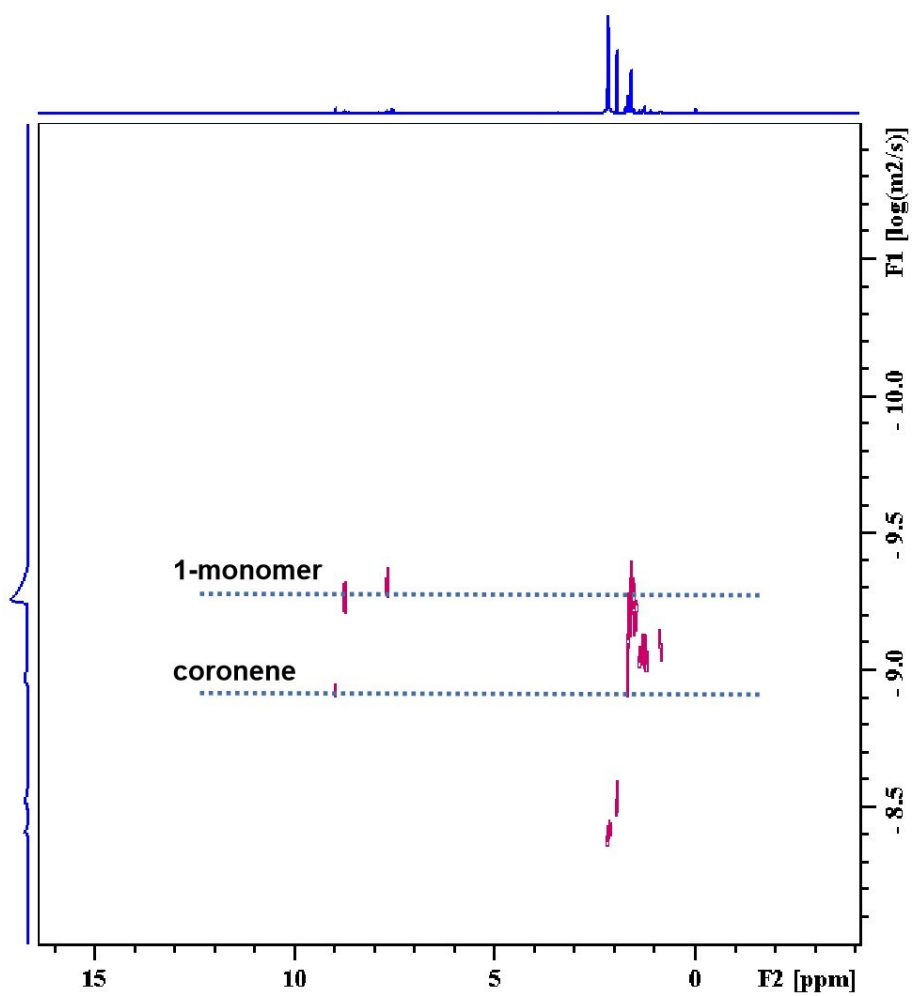

Fig. S16. The  $^1H$ - $^1H$  DOSY NMR spectra of coronene encapsulated by **1-monomer**.

#### 4. Calculated binding constants $K$ values based on $^1\text{H}$ NMR titrations.

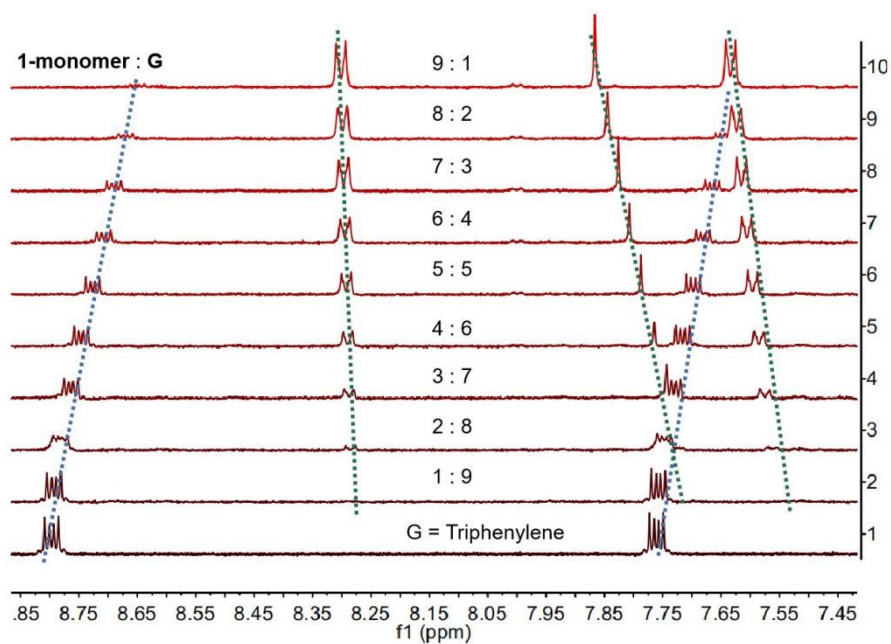

Fig. S17. Illustration of the Job's plot for determination of stoichiometry (triphenylene  $\square$  1-monomer).

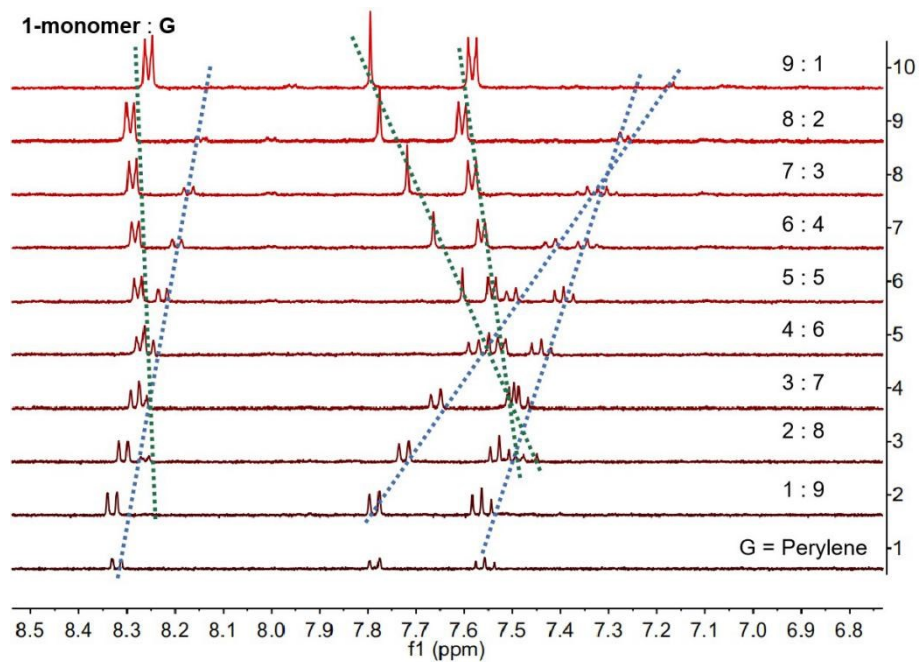

Fig. S18. Illustration of the Job's plot for determination of stoichiometry (perylene  $\square$  1-monomer).

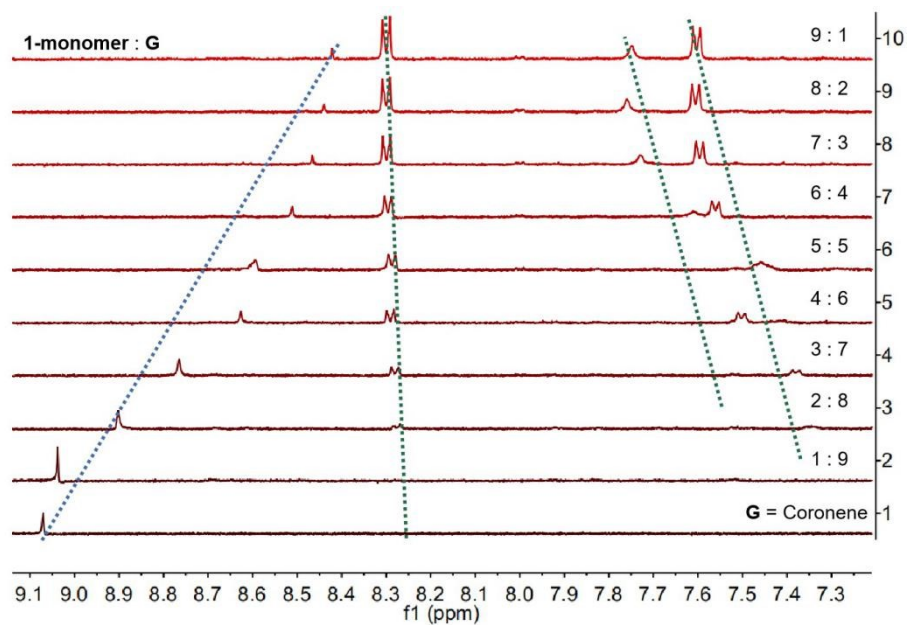

**Fig. S19.** Illustration of the Job's plot for determination of stoichiometry (coronene □ **1-monomer**).



## 5. IR spectra of complex 1.

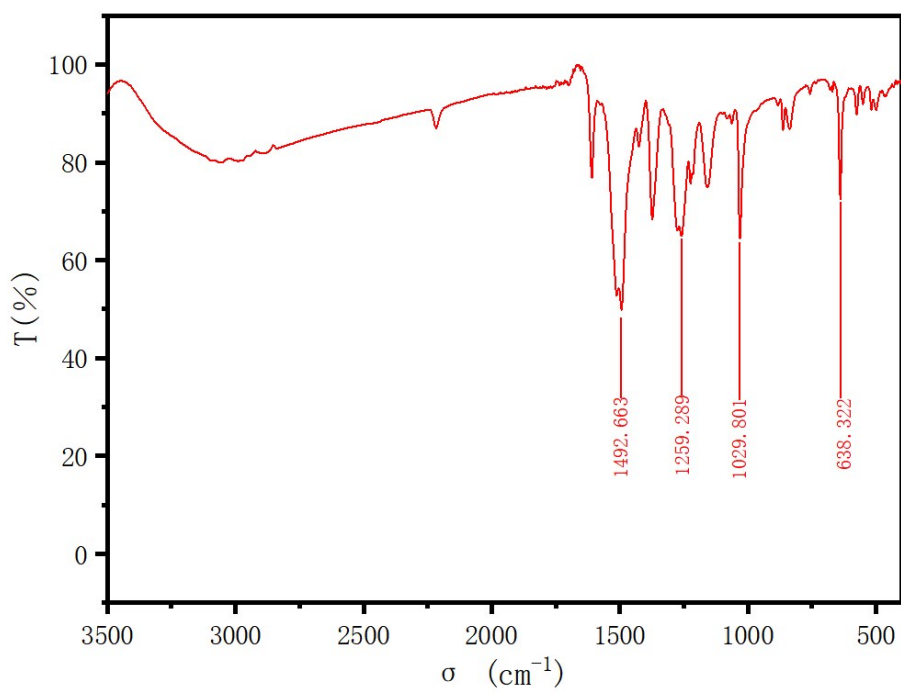

Fig. S20. IR spectra of complex 1.

## 6. Crystal data of 1.

Table S2. Crystal data of 1.

| 1                                                 |                                                                                                  |
|---------------------------------------------------|--------------------------------------------------------------------------------------------------|
| <i>Formula</i>                                    | C <sub>132</sub> H <sub>119</sub> Cl <sub>6</sub> N <sub>6</sub> O <sub>12</sub> Rh <sub>6</sub> |
| <i>M<sub>r</sub></i>                              | 2811.48                                                                                          |
| <i>T</i> [K]                                      | 173                                                                                              |
| <i>Crystal system</i>                             | Monoclinic                                                                                       |
| <i>Space group</i>                                | C2                                                                                               |
| <i>a</i> [Å]                                      | 41.690(5)                                                                                        |
| <i>b</i> [Å]                                      | 27.665(4)                                                                                        |
| <i>c</i> [Å]                                      | 16.596(2)                                                                                        |
| <i>α</i> [°]                                      | 90                                                                                               |
| <i>β</i> [°]                                      | 90.706(6)                                                                                        |
| <i>γ</i> [°]                                      | 90                                                                                               |
| <i>V</i> [Å <sup>3</sup> ]                        | 19140(4)                                                                                         |
| <i>Z</i>                                          | 4                                                                                                |
| <i>ρ<sub>calcd</sub></i> [g cm <sup>-3</sup> ]    | 0.976                                                                                            |
| <i>F</i> (000)                                    | 5684                                                                                             |
| <i>Crystal size</i> [mm <sup>3</sup> ]            | 0.20 × 0.15 × 0.13                                                                               |
| <i>2θ<sub>max</sub></i> [°]                       | 77.42                                                                                            |
| <i>Reflections collected</i>                      | 37376                                                                                            |
| <i>Independent reflections</i>                    | 27713                                                                                            |
| <i>Parameters</i>                                 | 1487                                                                                             |
| <i>R<sub>1</sub></i> [ <i>I</i> > 2σ( <i>I</i> )] | 0.1069                                                                                           |
| <i>wR<sub>2</sub></i> [all data]                  | 0.1976                                                                                           |
| <i>GOF</i>                                        | 1.070                                                                                            |
| <i>CCDC number</i>                                | 2053030                                                                                          |
